# Supplementary material for: Oxide surface-promoted Pd-complex catalysis for intramolecular O-activated alkene hydroamination: catalyst preparation, characterization, and performance
Source: Royal Society of Chemistry journal article supplement (doi:10.1039/b408419e), 2004-01-01
Supplement: b408419e.pdf [file b408419e.pdf]

## Supporting Information 1 M. Tada et al.

### Synthesis steps for the Pd precursors

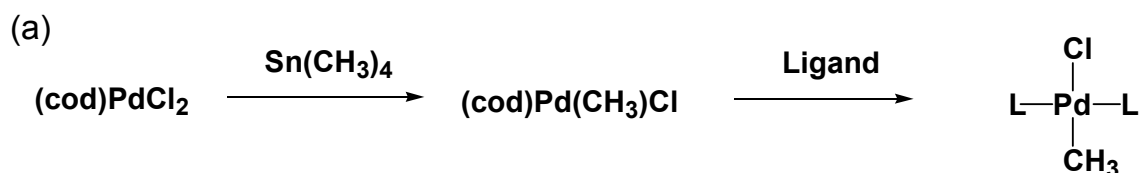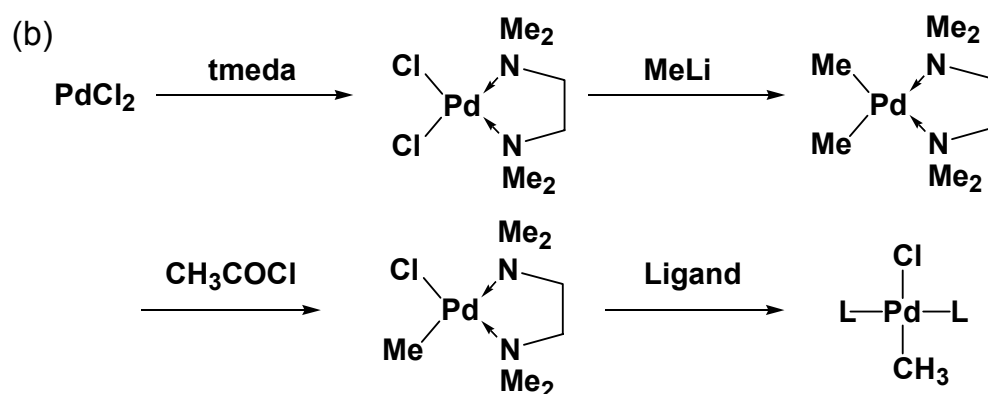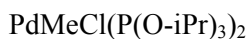

0.2 g of (cod)PdMeCl was dissolved in 5 ml of absolute  $\text{CH}_2\text{Cl}_2$  and cooled to 263 K under nitrogen atmosphere. 0.31 g of  $\text{P(O-}i\text{Pr)}_3$  was added to the solution and the reaction mixture was stirred at 273 K for 2 h. The solvent was evaporated under vacuum. Obtained crude crystal was recrystallized with n-hexane.

$^1\text{H NMR}$  ( $\text{CDCl}_3$ ):  $\delta=5.06$  (6H,  $\text{P(O-CH(CH}_3)_2)_3$ , m), 1.27 (36H,  $\text{P(O-CH(CH}_3)_2)_3$ , d), 0.74 (3H,  $\text{Pd-CH}_3$ , s).  $^{13}\text{C NMR}$ : 71.27 (OCH-), 24.69 ( $-\text{OCH-(CH}_3)_2$ ), 0.96 ( $\text{Pd-CH}_3$ ),  $^{31}\text{P}$ : 115.66.

#### PdClMe(tmeda)

PdMe<sub>2</sub>(tmeda) 0.53 g was dissolved in benzene 30 ml under nitrogen atmosphere and cooled at 273 K. Acetyl chloride 0.2 ml was added to the solution and stirred at 273 K for 1 h. The solvent was evaporated, and obtained solid was washed with n-pentane three times. Recrystallization was performed with CH<sub>2</sub>Cl<sub>2</sub>.

<sup>1</sup>H NMR (CDCl<sub>3</sub>): δ=2.49-2.78 (4H, -CH<sub>2</sub>-, m), 2.66 (6H, N(CH<sub>3</sub>)<sub>2</sub>, s), 2.57 (6H, N(CH<sub>3</sub>)<sub>2</sub>, s), 0.49 (3H, Pd-CH<sub>3</sub>, s). Anal. Calcd for PdClMe(tmeda): C, 30.79; H, 7.01; N, 10.26. Found: C, 30.57; H, 6.90; N, 10.17.

#### PdClMe(PMe<sub>2</sub>Ph)<sub>2</sub>

PdMeCl(tmeda) 0.35 g was dissolved in absolute CH<sub>2</sub>Cl<sub>2</sub> 10 ml under nitrogen atmosphere, and PMe<sub>2</sub>Ph 0.38 ml was added to the solution. The reaction mixture was stirred for 1 h, and the solvent was evaporated under vacuum. Recrystallization was carried out with acetone.

<sup>1</sup>H NMR (CDCl<sub>3</sub>): δ=7.36-7.65 (10H, Ph, m), 1.72 (12H, PMe<sub>2</sub>, d), 0.01 (3H, Pd-Me, s). <sup>31</sup>P NMR: -1.44. Anal. Calcd for PdClMe(PMe<sub>2</sub>Ph)<sub>2</sub>: C, 47.13; H, 5.82; N, 0. Found: C, 47.09; H, 5.77; N, 0.

#### (dppf)PdClMe

(cod)PdMeCl 0.20 g was dissolved in 5 ml of toluene under N<sub>2</sub> atmosphere, to which dppf (1,1-bis(diphenylphosphino)ferrocene) 0.42 g was added, followed by stirring for 1 h. The solvent was evaporated under vacuum, and obtained crude crystal was recrystallized with CH<sub>2</sub>Cl<sub>2</sub>.

<sup>1</sup>H NMR (CDCl<sub>3</sub>): 7.22-7.60 (20H, Ph, m), 4.46 (2H, Cp, s), 4.41 (2H, Cp, s), 4.21 (2H, Cp, s), 3.75 (2H, Cp, s), 0.75 (3H, Pd-Me, s).

#### (cyclohexylamine)<sub>2</sub>PdClMe

(cod)PdMeCl 0.20 g was dissolved in 5 ml of CH<sub>2</sub>Cl<sub>2</sub> under nitrogen atmosphere, and cyclohexylamine 0.15 g was added to the solution. White precipitate was formed immediately, and the solvent was evaporated under vacuum. Recrystallization was performed with acetone.

<sup>1</sup>H NMR (CDCl<sub>3</sub>): 2.77 (2H, NH<sub>2</sub>-CH-, m), 2.24 (4H, p-CH<sub>2</sub>-, m), 1.32 (8H, o-CH<sub>2</sub>-, m), 1.11 (8H, m-CH<sub>2</sub>-, m), 0.32 (3H, Pd-CH<sub>3</sub>, s).

#### (2-methylpiperidine)<sub>2</sub>PdClMe

(cod)PdMeCl 0.20 g was dissolved in 5 ml of CH<sub>2</sub>Cl<sub>2</sub> under nitrogen atmosphere. 2-methylpiperidine 0.15 g was added to the solution, and stirred for 1 h. The solvent was evaporated under vacuum. Recrystallization was carried out with acetone.

<sup>1</sup>H NMR (CDCl<sub>3</sub>): 2.95, 3.38 (4H, o-CH<sub>2</sub>-, m), 2.75 (2H, NH-CH-, m), 1.01, 1.71 (4H, NH-CH-CH<sub>2</sub>-, m), 1.20-1.35 (4H, p-CH<sub>2</sub>-, m), 1.45 (6H, NH-CHCH<sub>3</sub>-, d), 1.49-1.58 (4H, m-CH<sub>2</sub>-, m), 0.26 (3H, Pd-CH<sub>3</sub>, s). <sup>13</sup>C NMR: 54.81 (NH-CH<sub>2</sub>-), 51.44 (NH-CHCH<sub>3</sub>), 34.66 (NH-CHCH<sub>3</sub>-CH<sub>2</sub>-), 26.73 (NH-CH<sub>2</sub>-CH<sub>2</sub>-), 24.4 (NH-CH<sub>2</sub>-CH<sub>2</sub>-CH<sub>2</sub>-), 23.42 (NH-CHCH<sub>3</sub>-), -3.04 (Pd-CH<sub>3</sub>). Anal. Calcd for (2-methylpiperidine)<sub>2</sub>PdClMe: C, 43.95; H, 8.23; N, 7.89. Found: C, 43.41; H, 8.47; N, 7.82.

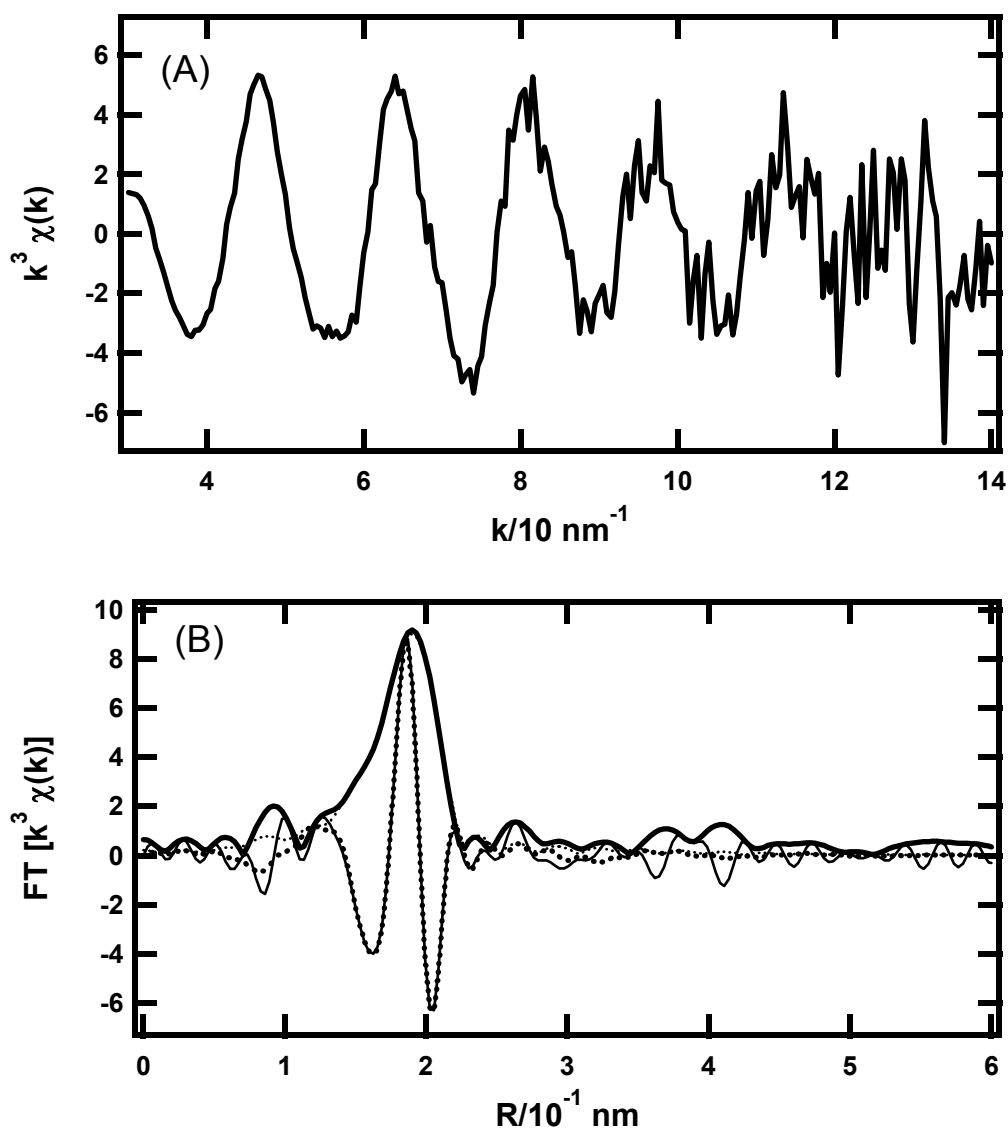

**Supporting Information** Pd K-edge EXAFS oscillation (A) and its Fourier transformed spectrum (B) of supported Pd-P (P:  $\text{PMe}_2\text{Ph}$ ) complex measured at 15 K. —: Absolute; - - -: imaginary; ..... and - · - · -: fitting for the absolute and imaginary parts, respectively.

**Supporting Information 2 M. Tada et al.**

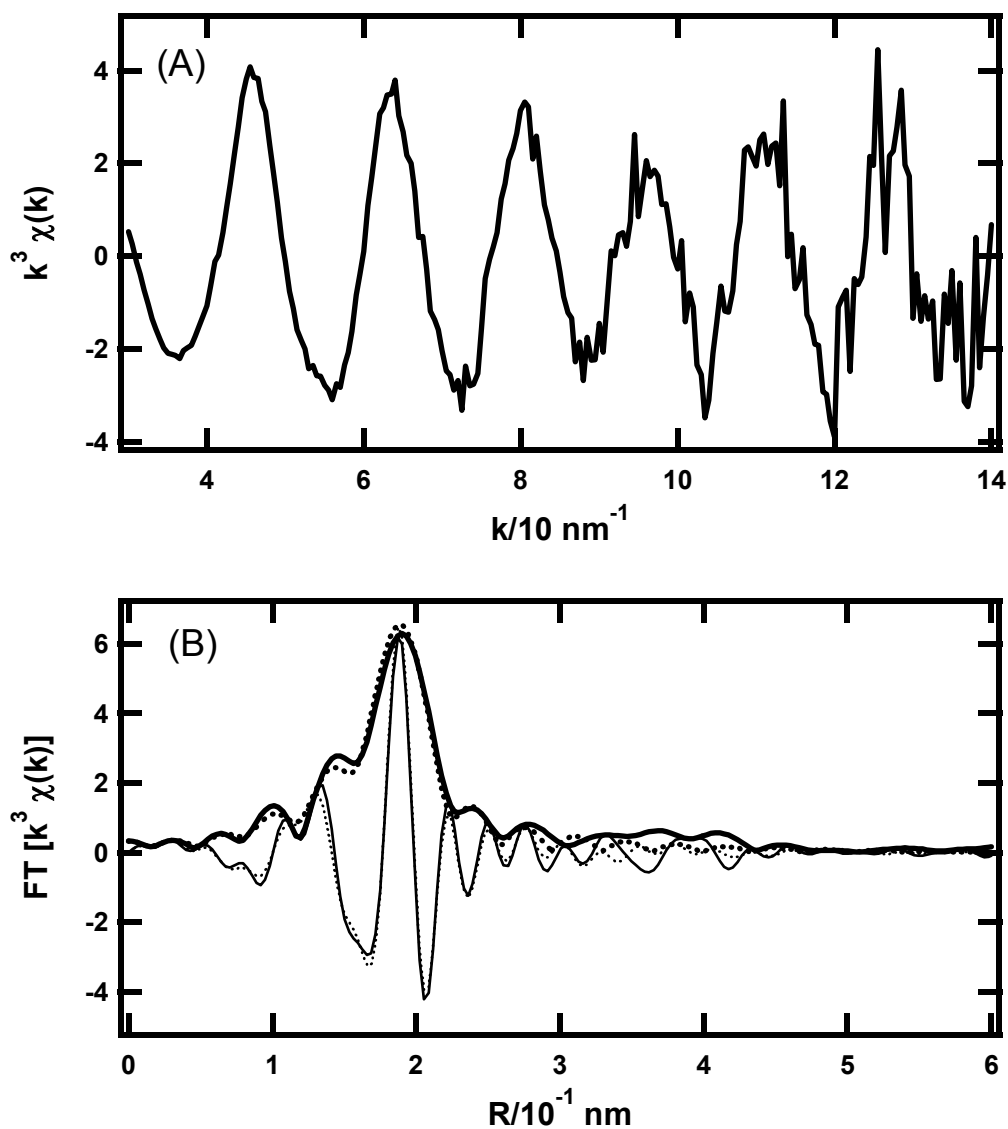

**Supporting Information** Pd K-edge EXAFS oscillation (A) and its Fourier transformed spectrum (B) of supported Pd-N (N: methylpiperidine) complex measured at 15 K. —: Absolute; —: imaginary; ..... and .....: fitting for the absolute and imaginary parts, respectively.

### Supporting Information 3 M. Tada et al.
